# Supplementary material for: Rhodamine-based chemosensor for Hg2+ in aqueous solution with a broad pH range and its application in live cell imaging
Source: Royal Society of Chemistry journal article supplement (doi:10.1039/c0ob00013b), 2010-01-01
Supplement: c0ob00013b.pdf [file c0ob00013b.pdf]

# **Rhodamine-based Chemosensor for Hg<sup>2+</sup> in Aqueous Solution with a Broad pH Range and Its Application in Live Cell Imaging**

Yun Zhao, Yue Sun, Xin Lv, Yunlong Liu, Maliang Chen, and Wei Guo\*

*School of Chemistry and Chemical Engineering, Shanxi University, Taiyuan 030006,*

*China. E-mail: guow@sxu.edu.cn*

## **Electronic Supplementary Information (ESI†)**

### **Contents**

- 1.** IR spectra of **1** and **1**-Hg<sup>2+</sup> complex in KBr disks (**Fig. S1**).
- 2.** <sup>1</sup>H NMR-titration experiments (**Fig. S2**).
- 3.** Effects of water content on the fluorescence of **1**-Hg<sup>2+</sup> system (**Fig. S3**).
- 4.** Time-dependent change in fluorescence intensity of **1** after Hg<sup>2+</sup> addition (**Fig. S4**).
- 5.** Determination of binding constant of the complex (**Fig. S5 and Fig. S6**).
- 6.** Selectivity investigation by absorption spectra (**Fig. S7**).
- 7.** Reversibility investigation by introduction of iodide anion (**Fig. S8**).
- 8.** <sup>1</sup>H NMR chart of **1** (**Fig. S9**).
- 9.** <sup>13</sup>C NMR chart of **1** (**Fig. S10**).
- 10.** EI-MS chart of **1** (**Fig. S11**).

## 1. IR spectra of **1** and **1**-Hg<sup>2+</sup> complex in KBr disks

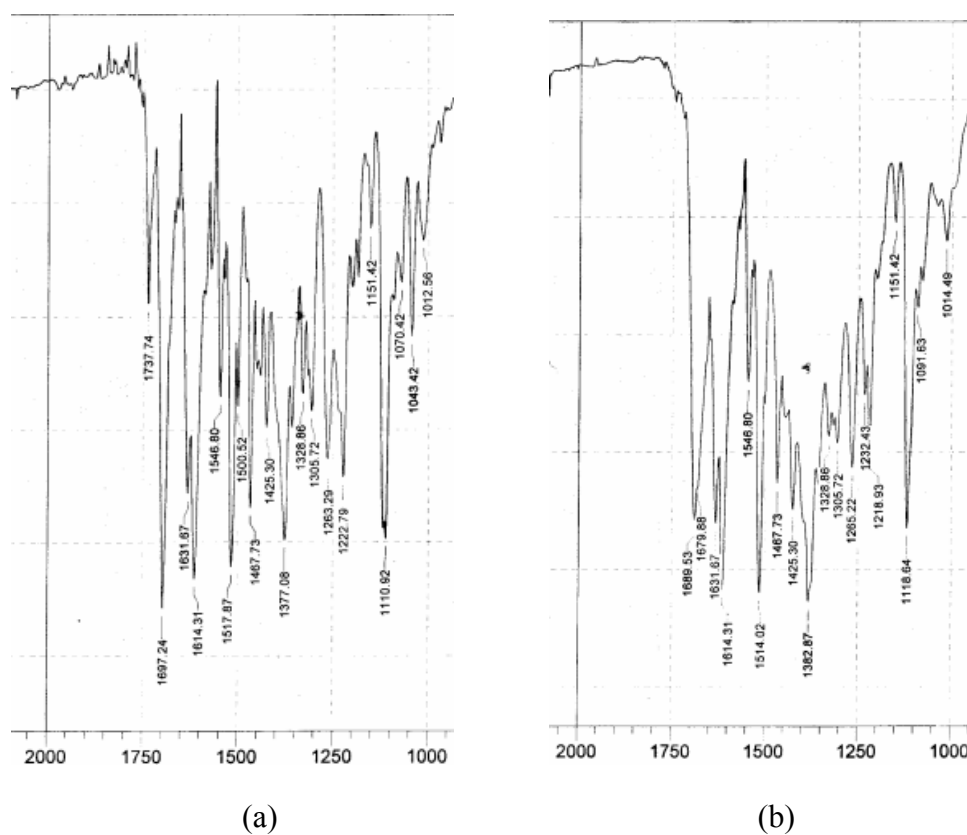

**Fig. S1** IR spectra of **1** (a) and **1**-Hg<sup>2+</sup> (b) were taken in KBr disks, respectively.

## 2. <sup>1</sup>H NMR-titration experiments (**Fig. S2**).

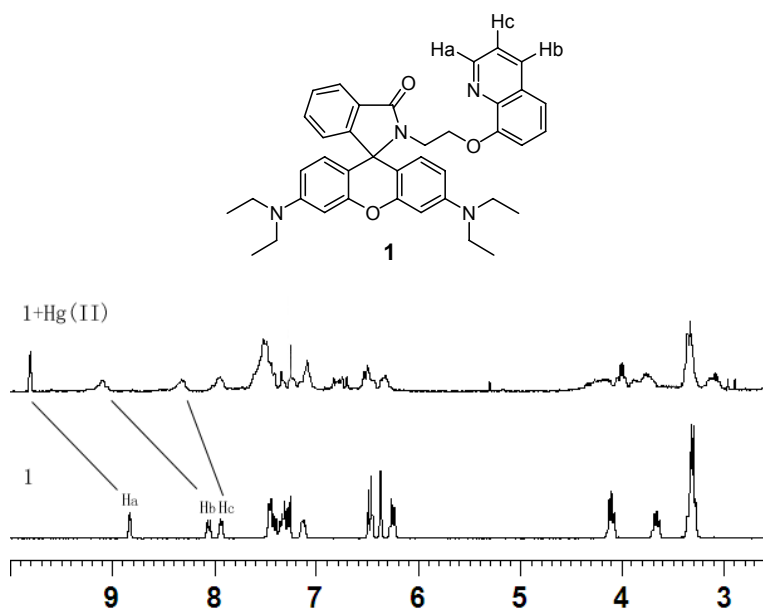

**Fig. S2** Hg<sup>2+</sup> <sup>1</sup>H NMR-titration of **1** (10.0 mM) with Hg<sup>2+</sup> (5 equiv.) in CDCl<sub>3</sub>.

### 3. Effects of water content on the fluorescence of **1**-Hg<sup>2+</sup> system.

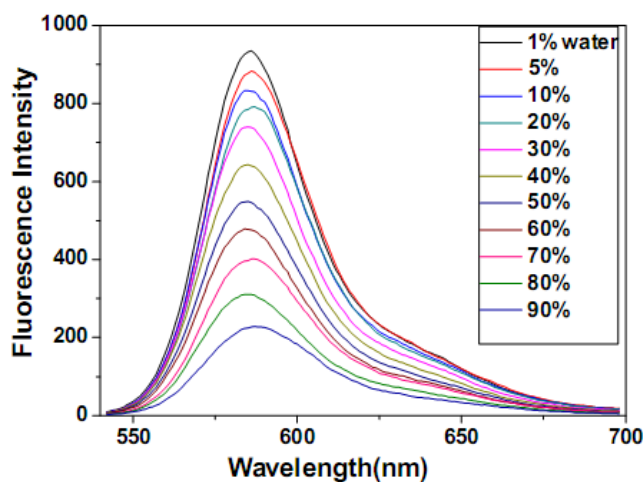

**Fig. S3** Effects of water content on the fluorescence of **1**-Hg<sup>2+</sup> system in aqueous acetonitrile solution. [**1**] = 20  $\mu$ M, [Hg<sup>2+</sup>] = 100 $\mu$ M.

### 4. Time-dependent change in fluorescence intensity of **1** after Hg<sup>2+</sup> addition

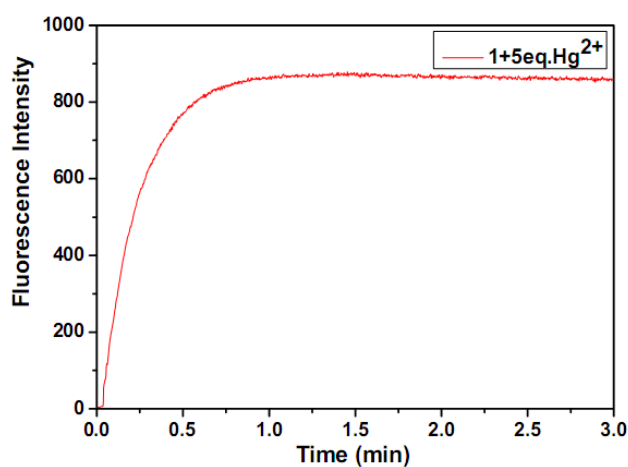

**Fig. S4** Time course of the response of **1** (20  $\mu$ M) in MeCN-water solution (95/5, v/v, pH=7.2) upon addition of 5 equiv. of Hg(NO<sub>3</sub>)<sub>2</sub>.

### 5. Determination of binding constant of the complex

The data obtained from fluorescence titration profile were fitted to be a 1:1 binding model according to following equation.

$$\Delta F = \frac{1}{2} \left\{ \alpha \left( [H]_0 + [G] + \frac{1}{K} \right) - \sqrt{\alpha^2 \left( [H]_0 + [G] + \frac{1}{K} \right)^2 - 4[H]_0[G] \alpha^2} \right\}$$

The binding constant (K) is an important parameter, indicating the inclusion

capacity of the host-guest complex. The binding constants ( $K$ ) can thus be obtained by a nonlinear least's squares analysis of  $\Delta F$  versus  $[\text{Hg}^{2+}]$ , fitting to the experimental data obtained from the absorption and fluorescence titrations. Where  $[\text{H}]_0$  and  $[\text{G}]_0$  are the initial concentrations of host sensor **1** and guest  $\text{Hg}^{2+}$ , respectively.  $\Delta F$  denotes the change of the absorption and fluorescence intensity of sensor **1** with the addition of  $\text{Hg}^{2+}$ .  $\alpha$  is a sensitive factor of the structure change of the complex  $1\text{-Hg}^{2+}$  at the interactive course ( $\alpha = (F_{\text{max}}-F_0)/[\text{G}]_0$ ).

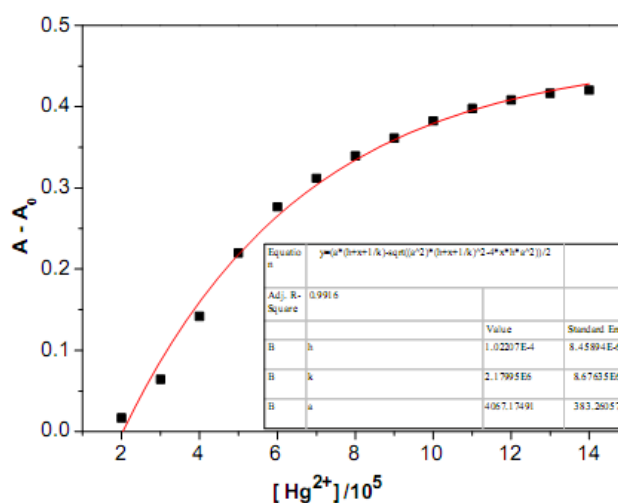

**Fig. S5** UV/VIS titration profile of **1** ( $20\mu\text{M}$ ) in MeCN-water solution (95:5, v/v, Ph=7.2), from which the association constant was determined,  $K_a = 2.18 \times 10^6 \text{ M}^{-1}$  ( $R^2 = 0.9916$ ).

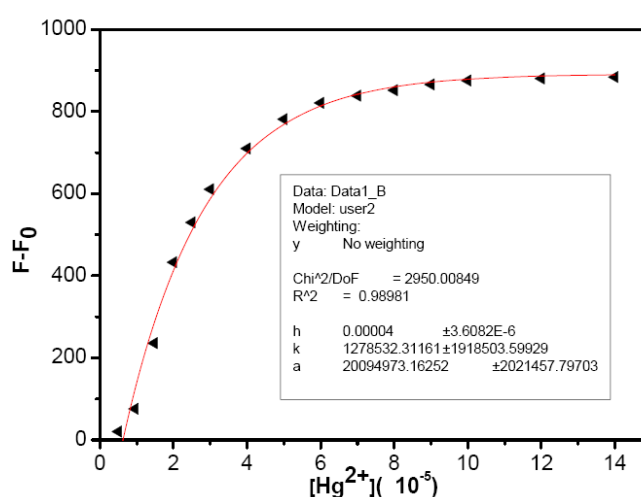

**Fig. S6** Fluorescence titration profile ( $\lambda_{\text{em}} = 530 \text{ nm}$ ) of **1** ( $20\mu\text{M}$ ) in MeCN-water solution (95:5, v/v, Ph=7.2), from which the association constant was determined,  $K_a = 1.27 \times 10^6 \text{ M}^{-1}$  ( $R^2 = 0.9898$ ).

## 6. Selectivity investigation by absorption spectra

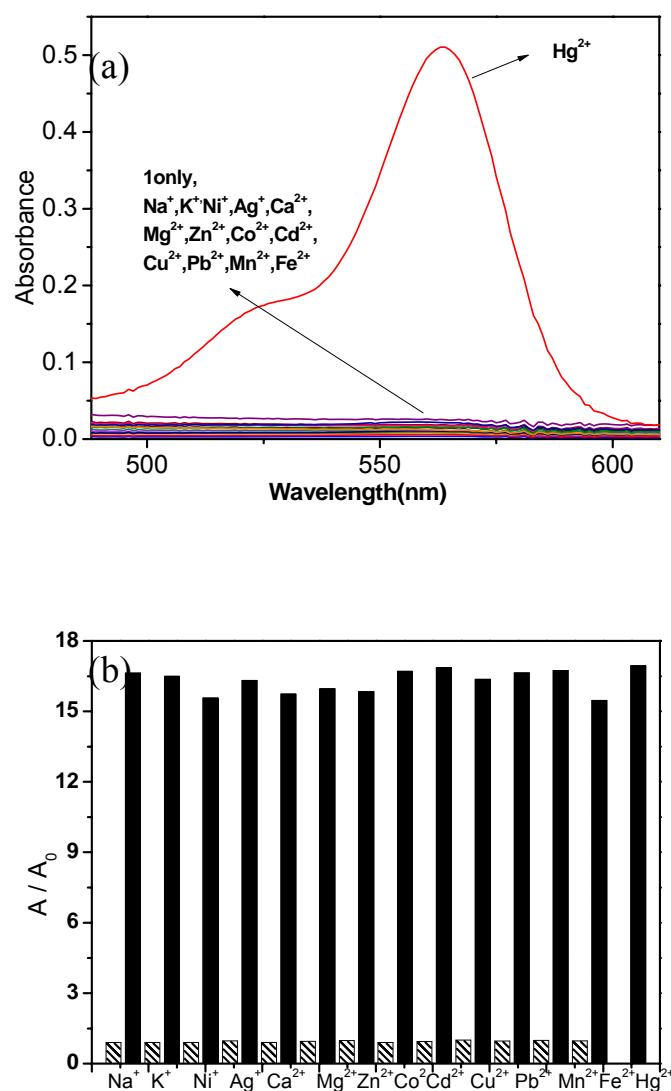

**Fig. S7** (a) The absorption spectra of **1** (20  $\mu\text{M}$ ) upon addition of 100  $\mu\text{M}$  of  $\text{Hg}^{2+}$  and various other metal ions in a MeCN-water solution (95/5, v/v, pH 7.2). (b) Absorption change of **1** (20  $\mu\text{M}$ ) to 100  $\mu\text{M}$  of  $\text{Hg}^{2+}$  in a MeCN-water solution (95/5, v/v, pH 7.2) containing 100  $\mu\text{M}$  of various metal ions.

## 7. Reversibility investigation by introduction of iodide anion.

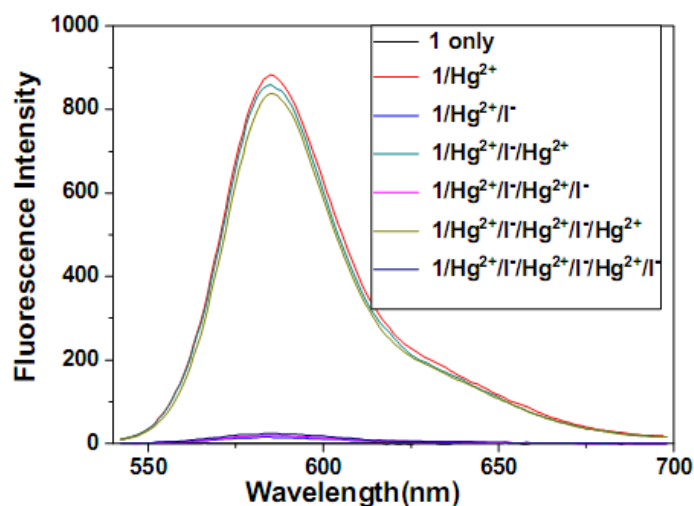

**Fig. S8** Reversibility of Hg<sup>2+</sup> coordination to probe **1** by I<sup>-</sup>. Slash denotes the sequence of addition. [1] = 2.0 × 10<sup>-5</sup> M, in aqueous acetonitrile solution (95/5, v/v, pH=7.2). [Hg<sup>2+</sup>](1<sup>st</sup>) = 1.0 × 10<sup>-4</sup> M, [I<sup>-</sup>] = 4.0 × 10<sup>-4</sup> M, [Hg<sup>2+</sup>](2<sup>nd</sup>) = 6.0 × 10<sup>-4</sup> M, [I<sup>-</sup>] = 2.4 × 10<sup>-3</sup> M, [Hg<sup>2+</sup>](3<sup>rd</sup>) = 1.8 × 10<sup>-3</sup> M, [I<sup>-</sup>] = 7.2 × 10<sup>-2</sup> M.

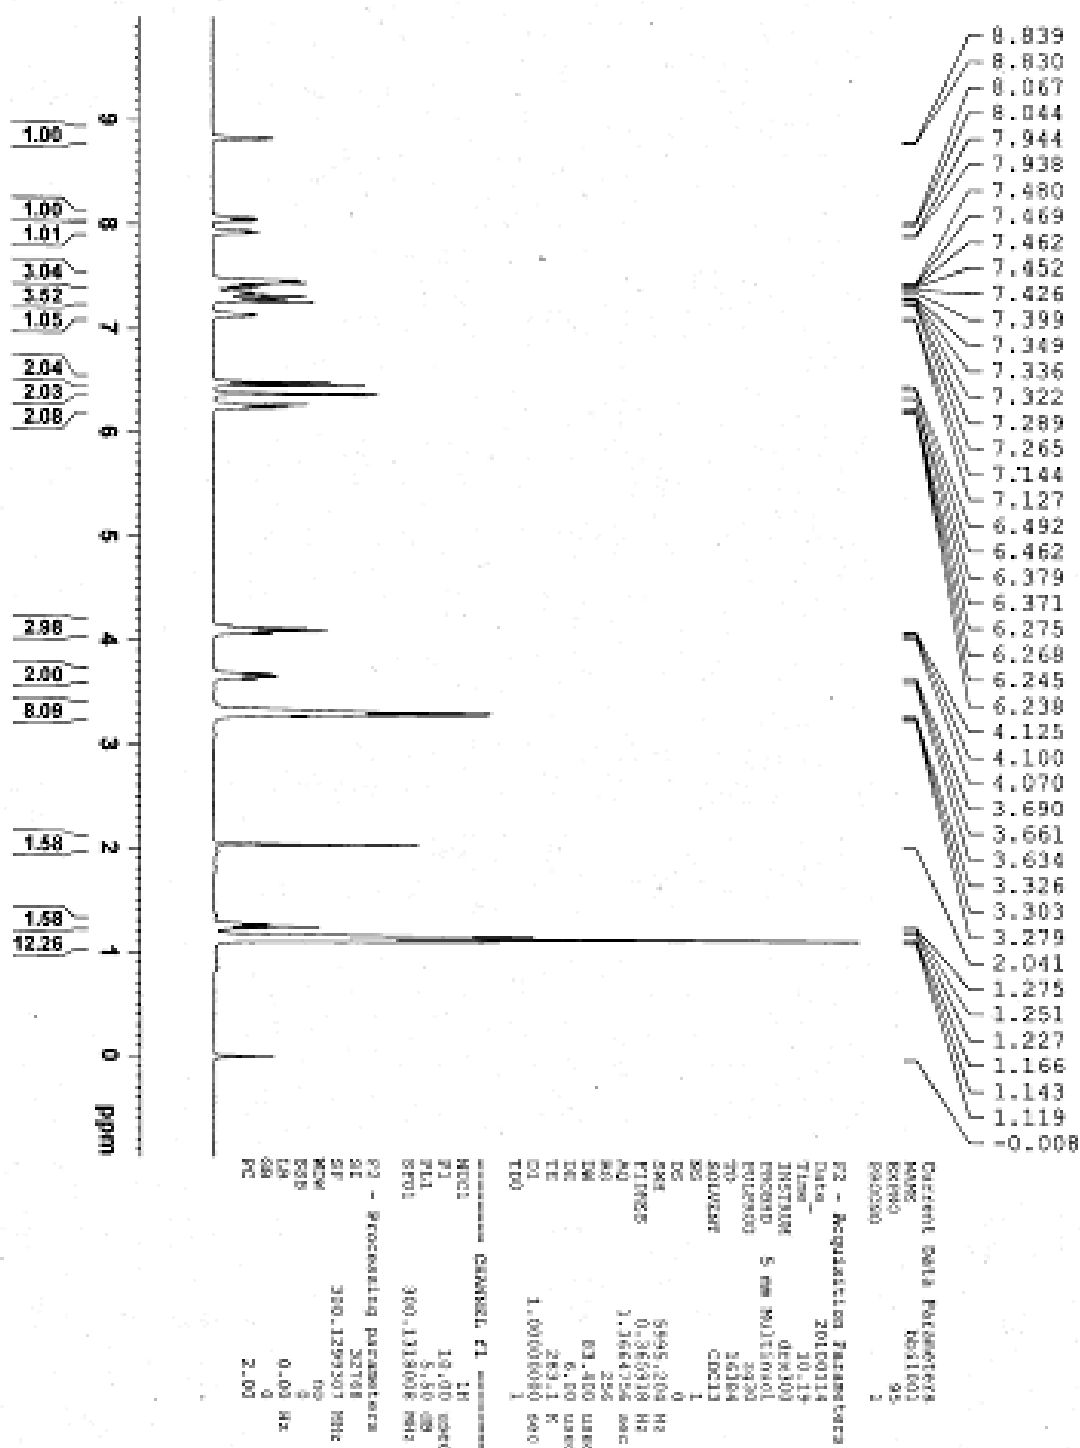

Fig. S9 <sup>1</sup>H NMR chart of 1 (CDCl<sub>3</sub>, 300MHz)

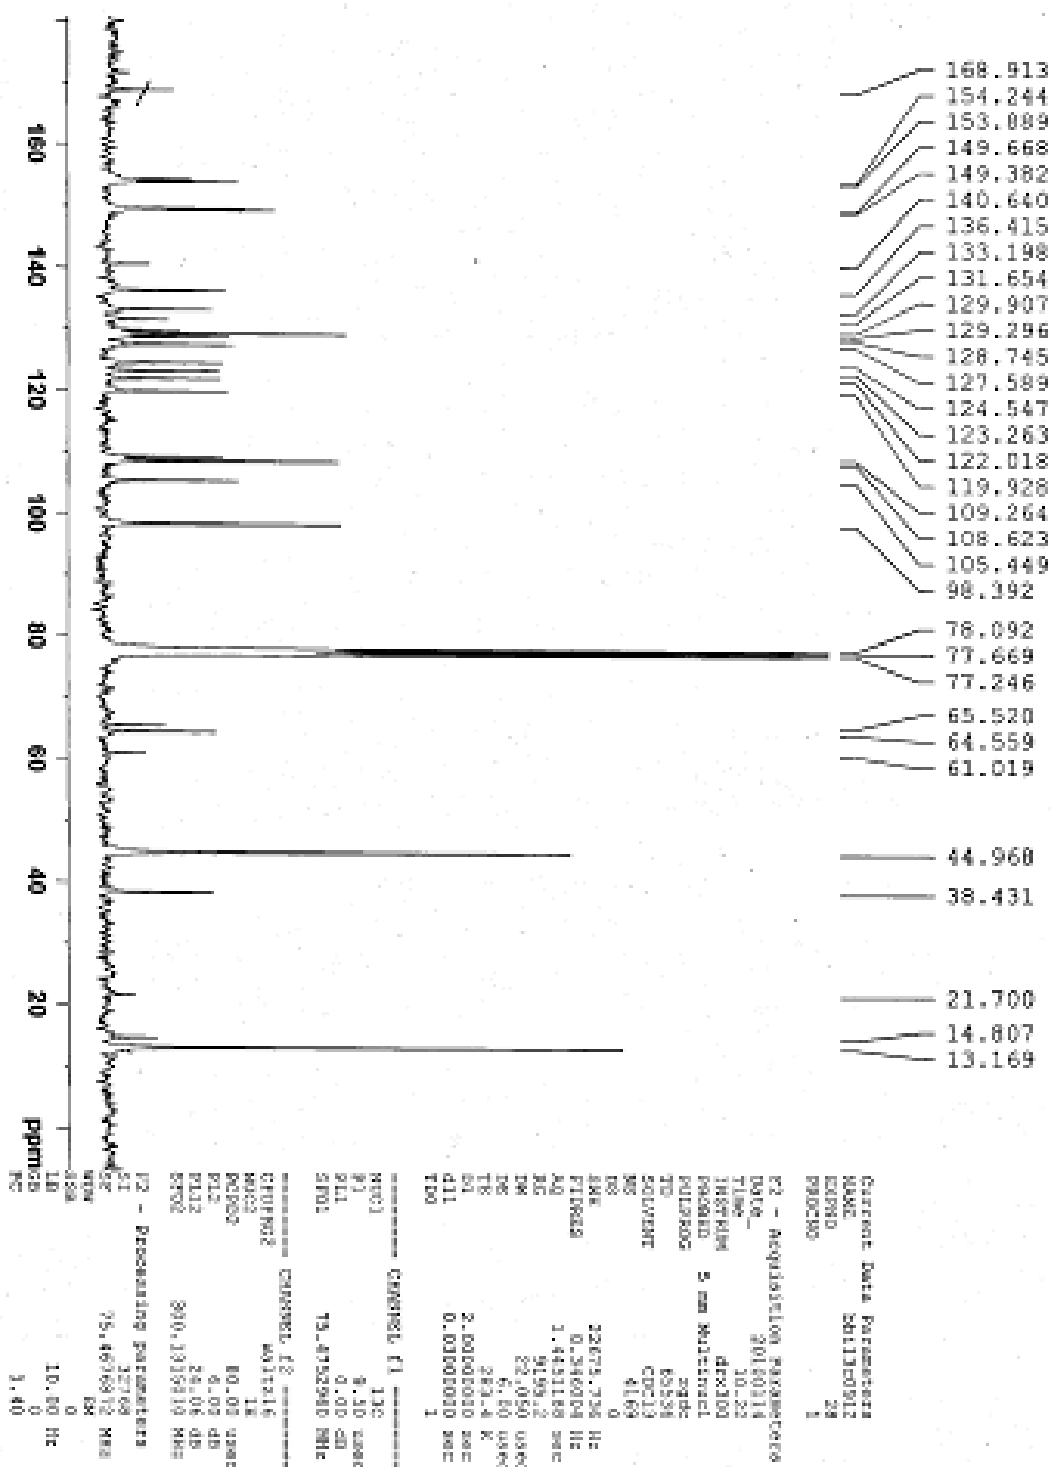

Fig. S10  $^{13}\text{C}$  NMR chart of **1** ( $\text{CDCl}_3$ , 75MHz)



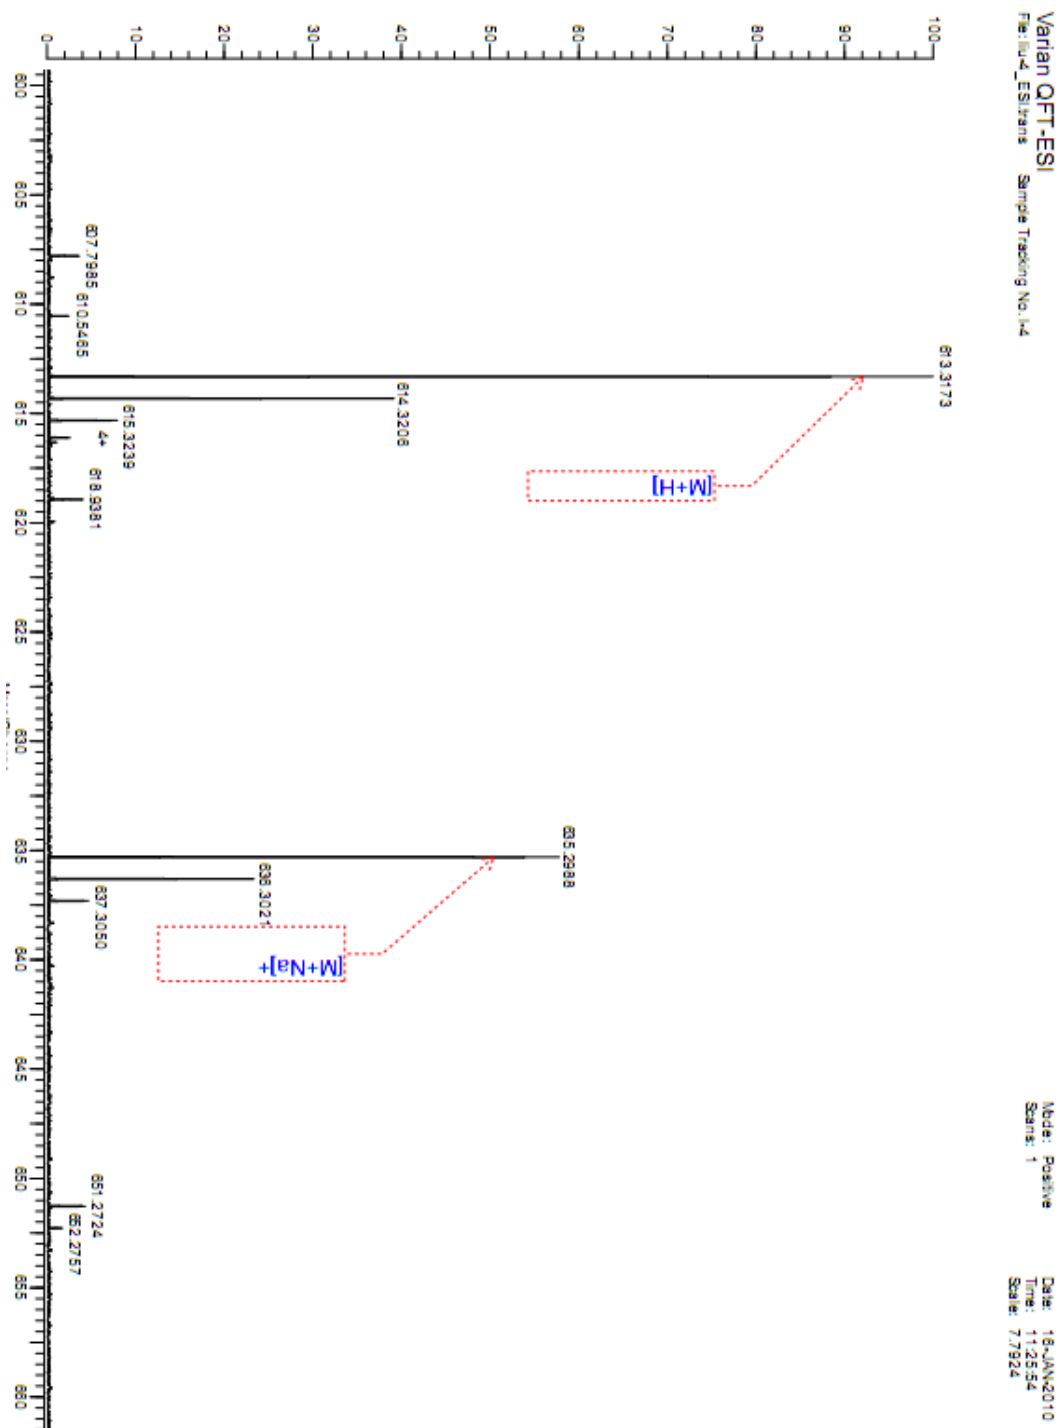

Fig. S11 EI-MS chart of **1**
